# Supplementary material for: Recent evolutionary decrease in the human pelvis size
Source: Research Square preprint supplement (doi:10.21203/rs.3.rs-6712615/v1), 2025-06-04
Supplement: Supplementary file 1 [file 3061a8a81e88ee4814d31522.docx]

Figure 1. Changes of the pelvic width (bi-iliocristal diameter), shoulder width (biacromial diameter) and body height by birthdate in Polish women of the same age group (18-22 years). Data for women born before 1940 come from the National Anthropometric Survey run in 1954, while data for women born later are from repeated National Survey data collections, including only young people.

Figure 2. Changes of the pelvic width (bi-iliocristal diameter), shoulder width (biacromial diameter) and body height by birthdate in Polish males. Data for men born before 1940 come from the National Anthropometric Survey run in 1954, while data for men born later are from repeated National Survey data collections including only young people. Identical with data for Polish women presented in Fig. 2 in the main text.

Figure 3. Changes of the pelvic width (bi-iliocristal diameter), shoulder width (biacromial diameter) and body height by birthdate in Mayan men living in Merida, Mexico.
